## Original article

## Flares in rheumatoid arthritis: do patient-reported swollen and tender joints match clinical and ultrasonography findings?

Dorota Kuettel <sup>1,2</sup>, Lene Terslev<sup>3</sup>, Ulrich Weber <sup>1,2</sup>, Mikkel Østergaard <sup>3</sup>, Jette Primdahl <sup>1,2,4</sup>, Randi Petersen <sup>1</sup>, Mads Ammitzbøll-Danielsen<sup>3</sup>, Sören Möller <sup>5</sup> and Kim Hørslev-Petersen <sup>1,2</sup>

## Abstract

**Objectives.** To investigate how patient-reported flares in RA are related to clinical joint examination and inflammation detected by US.

**Methods.** Eighty RA patients with DAS28-CRP <3.2 and no swollen joints at baseline were followed for 1 year. In case of patient-reported hand flare with swollen and tender joints (SJ and TJ, respectively), patients underwent clinical examination for SJ/TJ and US of bilateral wrists, MCP and PIP 1st–5th, six extensor tendon compartments and wrist flexor tendons for synovitis/tenosynovitis. Percentage agreement and kappa were calculated between patient-reported SJ and TJ, clinical examination for SJ/TJ and US findings indicative of inflammation. With US as reference, sensitivity, specificity, positive/negative predictive value and accuracy of patient-reported and clinically examined joints were determined.

**Results.** Hand flare was reported by 36% (29/80) of patients. At time of flare, all clinical and ultrasonographic measures of disease activity deteriorated compared with baseline. Agreement between patient-reported SJ/TJ, clinically examined SJ/TJ and US was slight (kappa = 0.02–0.20). Patients and clinicians agreed in 79–93% of joints, more frequently on SJ than TJ. With US as reference, specificities were 86–100% and 88–100%, and sensitivities 12–34% and 4–32% for patient-reported SJ/TJ and clinically examined SJ/TJ, respectively.

**Conclusion.** Over 12 months of follow-up, hand flare was reported by every third RA patient. Self-reported flares were associated with increased disease activity as determined by clinical examination and US. Patient-reported joint assessment may aid in capturing flares between routine clinical visits.

**Key words:** rheumatoid arthritis, patient-reported outcomes, flares, ultrasonography

## Rheumatology key messages

- Self-reported flares in RA patients were accompanied by worsening of clinical, laboratory and US parameters.
- RA patient self-assessments of joints may aid in capturing flares between routine clinical visits.

## Introduction

In RA, clinical assessment of joint swelling and tenderness is a cornerstone of routine monitoring of synovitis, a potential predictor of joint damage [1]. Joint counts are important elements of composite disease activity indices in RA, such as the DAS or the Simplified Disease Activity Index [2–4]. However, there are several limitations in the

evaluation of joint involvement, including reliability of clinical examination and inconsistencies in joint examination across consultations [5, 6]. Patients' self-assessment of disease activity may facilitate clinical decision-making, and patient-reported outcomes are already integrated in clinical trials and daily practice [7–9]. Shared decision-making and patient involvement in RA management are

University Hospital, Department of Clinical Research, University of Southern Denmark, Odense, Denmark

Submitted 6 March 2019; accepted 15 May 2019

Correspondence to: Dorota Kuettel, Danish Hospital for Rheumatic Diseases, University Hospital of Southern Denmark, Engelshøjgade 9A, DK-6400 Sønderborg, Denmark.  
E-mail: Dkuttel@gigtforeningen.dkdkuettel@health.sdu.dk

<sup>1</sup>Danish Hospital for Rheumatic Diseases, University Hospital of Southern Denmark, Sønderborg, <sup>2</sup>Department of Regional Health Research, University of Southern Denmark, Odense, <sup>3</sup>Copenhagen Center for Arthritis Research (COPECARE), Center for Rheumatology and Spine Diseases, Rigshospitalet – Glostrup, Glostrup, <sup>4</sup>Sygehus Sønderjylland, University Hospital of Southern Denmark, Aabenraa and <sup>5</sup>OPEN – Odense Patient data Explorative Network, Odense

recommended by EULAR and are preferred by most patients [8, 9]. This may improve self-management abilities and lead to sustainable health benefits in people with arthritis [10].

Several studies have evaluated the reliability of patient assessment of disease activity by exploring agreement between patient-reported joint counts and clinical examination [11–14]. Patient-reported tender joints correlate better with the evaluation by trained assessors than patient-reported swollen joints [14]. However, both patient-reported and health professional joint assessment have shown varying reliability, especially regarding joint swelling [5, 15–18].

RA flares are common and often occur between consultations [19]. There is limited evidence for whether patient self-assessment of joint inflammation is a reliable approach to capture transient flares that would otherwise go undetected between routine clinical visits. The clinical relevance of detecting flares to modify treatment in RA patients is underlined by more radiographic progression in those experiencing a flare than in those without flares [20]. Moreover, self-reported flares are independent predictors of joint damage and are associated with worse functional outcome [19, 21].

Our objectives were to assess the agreement between patient-reported swollen and tender joints, clinical examination and inflammation detected by US in RA patients at the time of patient-reported flare.

## Methods

### Study design and participants

For this prospective, observational study with a 1-year follow-up, consecutive RA patients were recruited from the outpatient clinic at the Danish Hospital for Rheumatic Diseases, Sønderborg, Denmark, when attending routine appointments.

Patients  $\geq 18$  years were eligible if they fulfilled the ACR 1987 or ACR/EULAR 2010 criteria for RA, were RF and/or anti-CCP positive, had a DAS based on CRP (DAS28-CRP)  $< 3.2$  at baseline and no clinically swollen joints. Tender joints were not an inclusion criterion as tender joints in contrast to swollen joints are not necessarily related to inflammatory joint involvement [22]. Further requirements were stable DMARD treatment and no intra-articular glucocorticoid injections 4 weeks prior to study entry.

Patients were requested to contact the hospital in case of a flare in a hand/wrist defined as worsening of RA accompanied by at least one swollen and tender joint, as perceived by the patient. Only the first flare was registered. Information about when the flare began was recorded and a flare visit was scheduled within 3 days upon patient's contact to the hospital.

The FLAre-in-RA study was approved by the local ethics committee (The Regional Scientific Ethical Committees for Southern Denmark, S-20160027) and was conducted according to the Declaration of Helsinki

2008. Written informed consent was obtained from all participants.

### Clinical, laboratory and patient-reported outcomes

Age, gender, weight, height, disease duration and ongoing therapy for RA were recorded at baseline.

At baseline and at flare visits, a senior rheumatologist or a trained research nurse carried out a clinical examination for swollen and tender joints and DAS28-CRP was calculated. Both evaluators were blinded to US results and patient reports. Likewise, the patients indicated swollen and tender joints on a mannequin sketch representing the same 28 joints. At the baseline visit patients received 10 min instruction by a trained research nurse and written information on how to perform joint assessment for swelling. Visual analogue scales were used to report the patient's and evaluator's global assessments. The Danish version of the HAQ was used to assess physical function. Patients completed two flare questionnaires: The Flare Instrument and the Outcome Measures in Rheumatology (OMERACT) flare questionnaire [23, 24]. Routine laboratory tests included CRP, RF and anti-CCP level.

### US examination at baseline and at flare

A General Electric Logiq E9 US machine with a multifrequency linear array transducer 6–15 was used for all examinations. Standardized Colour Doppler (CD) settings were kept unchanged throughout the study with Doppler frequency 7.5 MHz, pulse repetition frequency of 0.4 and Doppler gain just below the noise threshold [25]. CD was chosen over power Doppler because it is the most sensitive modality on this US machine [26]. One experienced musculoskeletal ultrasonographer performed all US examinations blinded to clinical, laboratory and patient-reported data. Patients were asked not to talk about their symptoms during scanning and all examinations were performed in the same darkened room, on the same day as the clinical examination. The US protocol included multiplanar scanning of 22 joints/regions at each visit: bilateral wrists (radiocarpal, midcarpal and distal radioulnar joints, dorsal recesses), the 1st–5th MCP, dorsal recesses, the 1st interphalangeal joint, the 2nd–5th PIP, dorsal and volar recesses, bilateral I–VI extensor tendon compartments and bilateral three flexor tendons/groups: flexor carpi radialis, flexor pollicis longus and combined flexor digitorum superficialis and profundus. Synovitis and tenosynovitis were defined according to the OMERACT US definitions, assessed by CD and grey scale (GS) and graded semi quantitatively 0–3 according to the EULAR-OMERACT scoring systems [27–30]. US-positive joint/tendon sheath was defined as an EULAR-OMERACT combined score  $\geq 1$ . Grade 1 EULAR-OMERACT combined score is defined as hypoechoic synovial/tenosynovial hypertrophy grade 1 and CD grade  $\leq 1$  [27, 28]. The wrist was considered positive for US tenosynovitis if the combined US score was  $\geq 1$  in one or more tendon.

To assess the reliability of the US examiner (D.K.), inter-rater reliability was tested against an US expert (L.T.), and

intra-rater reliability was assessed by scoring and re-scoring 40 randomly selected images from the study with a 2-month interval.

### Statistical analysis

For normally distributed data, parametric analyses (paired sample *t*-test) and for non-normally distributed data non-parametric analyses (Wilcoxon matched-pairs signed rank test) were applied.

Cohen's kappa and percentage agreement were calculated between US inflammation (synovitis and/or tenosynovitis in wrist, synovitis in MCP and PIP) and 22 self-assessed, respectively, clinically examined joints in wrists and hands (separately for tenderness and swelling). Likewise, agreement between the patients' and the evaluators' assessment of tenderness and swelling was examined. The following thresholds for kappa agreement were applied: <0.00 poor, 0.00–0.20 slight, 0.21–0.40 fair, 0.41–0.60 moderate, 0.61–0.80 substantial and 0.81–1.00 almost perfect [31]. Furthermore, we determined sensitivity, specificity, positive/negative predictive value and accuracy of patient-report and clinical examination for joint swelling and tenderness using US-detected inflammation as the reference method. *P*-values  $\leq 0.05$  were considered statistically significant. Statistical analyses were performed using Stata version 15.0 (StataCorp., College Station, TX, USA).

## Results

### Patients' characteristics, clinical findings and patient-reported outcomes

Eighty patients with established RA were included. At baseline, none of the patients reported swollen joints and no swollen joints were detected at clinical examination. Mean (s.d.), [range] numbers of patient-reported and clinically examined tender joints were 1.0 (1.9) [0–8] and 0.8 (1.5) [0–7], respectively. Mean DAS28-CRP was 2.0 (0.7) [1.2–3.1]. Demographic and clinical characteristics at baseline and at the flare visit are shown in Table 1.

Thirty-six percent (29/80) reported a hand flare and contacted the clinic for a flare visit during the 1-year follow-up. At the flare visit, all measures of disease activity increased as compared with baseline (Table 1). Average (s.d.) [range] DAS28-CRP increased to 3.5 (1.0) [1.2–5.3] ( $P < 0.001$ ) and 65.5% (19/29) of patients fulfilled the DAS flare definition (an increase in DAS28  $> 1.2$ ) at the time of patient-reported flare [32]. Furthermore, all patient-reported outcomes deteriorated significantly, for both flare questionnaires, and patients' global assessment increased from 22.1 (23.1) [0–84] to 43.4 (26.2) [0–85] (Table 1).

### Onset of patient-reported flare and patients' delay

Mean (s.d.) [range] number of days between baseline and flare visit was 100.2 (92.6) [9–279]. The mean (s.d.) delay between patient reported flare onset and contact to the hospital was 3 (8.7) [0–48] days. Most patients (16/29) were scheduled for the flare visit the same day they

contacted the outpatient clinic, while 10, 2 and 1 patients were seen within 1, 2 and 3 days, respectively.

### Reliability assessment of the US examiner

For the US examiner, the inter-rater reliability expressed by kappa was 0.90 for both GS and CD synovitis, and 0.85 and 1.0 for GS and CD tenosynovitis, respectively. Intra-rater reliability was 0.85 and 1.0 for GS and CD, respectively, both for synovitis and tenosynovitis.

### US findings at baseline and at flare

At baseline, US detected synovitis in 63.8% (37/58) and tenosynovitis in 19% (11/58) of wrists. In MCP and PIP joints synovitis was found in 25.2% (73/290) and 12.1% (35/289) of joints, respectively.

At flare, US showed synovitis in 84.5% (49/58) and tenosynovitis in 41% (24/58) of wrists. In MCP and PIP joints synovitis was detected in 40.0% (116/290) and 17.6% (51/289), respectively.

### Agreement between patient-reported and clinically examined swollen and tender joints at flare

For swelling and tenderness, respectively, agreement between patient-report and clinical examination showed the highest concordance in PIP (93% and 83%), followed by MCP (88% and 82%) and wrist (79% and 79%) (Table 2). Kappa ranged from fair to moderate (0.23–0.50).

### Agreement between patient-reported and clinically determined swollen and tender joints at flare and inflammation by US

The agreement for joint swelling and tenderness by clinical examination and signs of inflammation (synovitis and/or tenosynovitis) by US was slightly better than the agreement between patient-reported joint involvement and US (Table 3). The highest percentage agreement was found for PIP (74–81%), followed by MCP (60–65%) and wrist (41%). Overall, agreement expressed by kappa was slight, ranging from 0.02–0.20 for clinical examination and 0.03–0.12 for patient report.

### Sensitivity, specificity, positive and negative predictive value, and accuracy of patient-reported and clinically examined swollen and tender joints with US inflammation as the reference method at flare

Using US as a reference, clinically swollen joints showed a high specificity of 100% (95% CI 63–100), 98% (95% CI 95–100) and 97% (95% CI 95–99) in wrist, MCP and PIP, respectively (Table 4). Likewise, specificity for patient-reported joint swelling was high, though slightly lower than clinical swelling: 87% (95% CI 47–100), 91% (95% CI 86–95) and 95% (95% CI 91–97) in wrist, MCP and PIP, respectively. The specificities of clinically assessed and patient-reported tender joints were good but lower than those of swollen joints (Table 4). The sensitivities of clinical examination and patient-reported joint involvement and inflammation by US were low, ranging from 4 to 34% (Table 4). The highest positive predictive value of 100% (95% CI 79–100) was observed for clinically examined

**TABLE 1** Baseline and flare visit characteristics of RA patients reporting flare during 1 year of follow-up

| Characteristics                          | BL                     | FV                   | P-value BL vs FV |
|------------------------------------------|------------------------|----------------------|------------------|
| Age, years                               | 64.8 (9.7) [47–82]     | N/A                  | N/A              |
| Female/male (%)                          | 20/9 (69/31)           | N/A                  | N/A              |
| Disease duration, years                  | 10.3 (5.5) [2–21]      | N/A                  | N/A              |
| Anti-CCP positive (%)                    | 27 (93)                | N/A                  | N/A              |
| IgM RF positive (%)                      | 26 (90)                | N/A                  | N/A              |
| cDMARD (%)                               | 27 (93)                | 27 (93)              | N/A              |
| cDMARD + bDMARD (%)                      | 4 (14)                 | 4 (14)               | N/A              |
| No ongoing treatment (%)                 | 2 (7)                  | 2 (7)                | N/A              |
| Glucocorticoids (%)                      | 0 (0)                  | 0 (0)                | N/A              |
| BMI                                      | 27.7 (5.2) [20.1–42.3] | N/A                  | N/A              |
| DAS28-CRP                                | 2.0 (0.7) [1.2–3.1]    | 3.5 (1.0) [1.2–5.3]  | <0.0001          |
| CRP, mg/l                                | 5.7 (8.6) [0.0–33]     | 10.1 (12.7) [0.4–48] | <0.001           |
| ESR, mm/h                                | 12.8 (9.1) [2–40]      | 17.8 (13.9) [1–71]   | <0.001           |
| TJC28 [0–28]                             | 0.8 (1.5) [0–7]        | 4.0 (3.5) [0–12]     | <0.0001          |
| SJC28 [0–28]                             | 0 (0) [0–0]            | 1.5 (1.0) [0–4]      | <0.0001          |
| Patient-reported TJC28 [0–28]            | 1 (1.9) [0–8]          | 4.0 (3.0) [1–11]     | <0.0001          |
| Patient-reported SJC28 [0–28]            | 0 (0) [0–0]            | 2.8 (2.9) [1–11]     | <0.0001          |
| VAS_patient_global [0–100]               | 22.1 (23.1) [0–84]     | 43.4 (26.2) [0–85]   | <0.0001          |
| VAS_evaluator [1–100]                    | 4.1 (3.2) [0–11]       | 16.2 (13.1) [2–74]   | <0.0001          |
| HAQ                                      | 0.4 (0.4) [0–1.5]      | 0.6 (0.5) [0–1.5]    | <0.001           |
| Flare instrument total score [0–120]     | 22.7 (23.2) [0–92]     | 47.4 (27.4) [0–93]   | <0.0001          |
| OMERACT flare questionnaire [range 0–50] | 10.1 (9.6) [0–33]      | 22.9 (12.7) [1–49]   | <0.0001          |
| US joint count [0–22]                    | 5.2 (3.4) [0–14]       | 8.1 (3.7) [1–18]     | <0.001           |

Mean (s.d.) [range] scores or counts (%) of demographic, clinical, patient-reported and US characteristics at baseline and flare visit. BL: baseline; bDMARD: biological DMARD; cDMARD: conventional DMARD; FV: flare visit; OMERACT: Outcome Measures in Rheumatology; SJC: swollen joint count; TJC: tender joint count; VAS: visual analogue scale. *P*-value for paired data comparison between two time points.

wrist, for both swelling and tenderness, followed by patient-reported wrist. Positive predictive values were lower in MCP, and lowest in PIP.

## Discussion

In this observational 1-year follow-up study, 36% of the RA patients in remission or low disease activity with clinically no swollen joints at inclusion experienced self-reported flare in the hand/wrist. Flares were consistently characterized by worsening of clinical and laboratory disease activity parameters and in parallel by increased ultrasonographic inflammation in joints and tendons, indicating inflammation as key trigger to flares. We found a fair to moderate agreement between patient-reported joint involvement and clinical joint examination for swollen and tender joints. However, joint swelling and tenderness, as determined by clinical examination and patients' self-report, did not correspond with US signs of inflammation at joint/site level, showing only slight kappa values. Both clinical examination and patients' self-report were highly specific for inflammation as detected by US, but their sensitivities were limited.

There are different approaches to defining a flare in RA. The two main definitions are a patient-reported worsening, and definitions based on clinical features and/or laboratory tests [33]. In this study, flares were defined by the

patient's perception of disease worsening along with patient's perception of at least one swollen and tender joint. We do not presume that this definition covers the whole spectrum of flare experiences from the patients' perspective [34]. Nonetheless, these two domains have been identified as key features in describing worsening of disease activity by patients and clinicians [23, 34]. Flares, seen from the patients' position, do not always translate into increased inflammation [35]. However, all the patients who contacted our outpatient clinic because of perceived worsening of their RA displayed signs of increased inflammatory activity by clinical evaluation and/or US assessment.

Consistent with our findings, several studies have shown limited agreement at joint level between clinical examination and US [15, 36, 37]. Potential explanations for this discrepancy include factors such as joint deformity or OA. Clinical examination has inferior capacity to discriminate active from structural joint lesions compared with imaging modalities. OA or joint deformities such as subluxation may hamper clinical joint assessment, and joint tenderness may be induced mechanically rather than by immune-mediated inflammation. These factors may contribute to the overdiagnosis of synovitis by clinical examination/patient report.

Furthermore, it has been observed that the degree and direction of discrepancy between clinically and US-detected synovitis may be related to joint region and size:

**TABLE 2** Agreement between patient-reported and clinically examined swollen and tender joints at flare

| Joint/site | No of joints/sites examined | Comparison between                                            | +/+ | +/- | -/+ | -/- | % agreement | Kappa (95% CI)   |
|------------|-----------------------------|---------------------------------------------------------------|-----|-----|-----|-----|-------------|------------------|
| Wrist      | n = 58                      | Clinically examined swelling vs patient-reported swelling     | 11  | 5   | 7   | 35  | 79          | 0.50 (0.26–0.75) |
|            |                             | Clinically examined tenderness vs patient-reported tenderness | 10  | 6   | 6   | 36  | 79          | 0.48 (0.23–0.73) |
| MCP        | n = 290                     | Clinically examined swelling vs patient-reported swelling     | 10  | 8   | 27  | 245 | 88          | 0.30 (0.14–0.47) |
|            |                             | Clinically examined tenderness vs patient-reported tenderness | 25  | 29  | 24  | 212 | 82          | 0.37 (0.24–0.51) |
| PIP        | n = 289                     | Clinically examined swelling vs patient-reported swelling     | 4   | 4   | 15  | 266 | 93          | 0.27 (0.04–0.50) |
|            |                             | Clinically examined tenderness vs patient-reported tenderness | 12  | 21  | 27  | 229 | 83          | 0.23 (0.09–0.39) |

PIP n = 289, as one patient had an amputation.

**TABLE 3** Agreement between patient-reported/clinically examined joints vs US inflammation<sup>a</sup> at flare

| Joint/site | No of joints/sites examined | Comparison between                                | +/+ | +/- | -/+ | -/- | % agreement | Kappa (95% CI)    |
|------------|-----------------------------|---------------------------------------------------|-----|-----|-----|-----|-------------|-------------------|
| Wrist      | n = 58                      | Clinically examined swelling vs US inflammation   | 16  | 0   | 34  | 8   | 41          | 0.12 (0.03–0.20)  |
|            |                             | Patient-reported swelling vs US inflammation      | 17  | 1   | 33  | 7   | 41          | 0.08 (–0.03–0.19) |
|            |                             | Clinically examined tenderness vs US inflammation | 16  | 0   | 34  | 8   | 41          | 0.12 (0.03–0.20)  |
|            |                             | Patient-reported tenderness vs US inflammation    | 16  | 0   | 34  | 8   | 41          | 0.12 (0.03–0.20)  |
| MCP        | n = 290                     | Clinically examined swelling vs US inflammation   | 15  | 3   | 101 | 171 | 64          | 0.13 (0.06–0.20)  |
|            |                             | Patient-reported swelling vs US inflammation      | 21  | 16  | 95  | 158 | 62          | 0.10 (0.01–0.19)  |
|            |                             | Clinically examined tenderness vs US inflammation | 34  | 20  | 82  | 154 | 65          | 0.20 (0.09–0.3)   |
|            |                             | Patient-reported tenderness vs US inflammation    | 25  | 24  | 91  | 150 | 60          | 0.09 (–0.01–0.19) |
| PIP        | n = 289                     | Clinically examined swelling vs US inflammation   | 2   | 6   | 49  | 232 | 81          | 0.02 (–0.06–0.11) |
|            |                             | Patient-reported swelling vs US inflammation      | 6   | 13  | 45  | 225 | 80          | 0.08 (–0.04–0.20) |
|            |                             | Clinically examined tenderness vs US inflammation | 13  | 20  | 38  | 218 | 80          | 0.20 (0.06–0.34)  |
|            |                             | Patient-reported tenderness vs US inflammation    | 8   | 31  | 43  | 207 | 74          | 0.03 (–0.09–0.15) |

<sup>a</sup>US inflammation: synovitis and/or tenosynovitis in wrist and synovitis in MCP and PIP was present if EULAR-OMERACT combined score was  $\geq 1$ . Grade 1 EULAR-OMERACT combined score is defined as hypoechoic synovial/tenosynovial hypertrophy grade 1 and colour Doppler grade  $\leq 1$ . OMERACT: Outcomes Measures in Rheumatology.

superior concordance has been observed for larger joints (shoulder, elbow, knee and ankle) compared with smaller joints (PIP, MCP and wrist) [38].

US is more sensitive than clinical examination for detecting synovitis and tenosynovitis and our observations are consistent with previous reports showing low sensitivity and high specificity of clinical examination with US as reference [39–41]. One study assessed the concordance of clinical joint swelling and US synovitis in 28 joints of seven active RA patients and concluded that kappa

agreement was poor, with percentage agreement of 73% [15]. In our study, the overall agreement between clinical examination and US ranged from 41 to 81%, while kappa agreement was slight.

To date, only a few studies have assessed the relationship between patients' self-assessment of joints and US signs of inflammation [18, 37, 38, 42]. Direct comparisons across studies are challenging because different US scoring systems are used in different sets of joints/sites, and different measures of agreement are used. Keeping these



**TABLE 4** Sensitivity, specificity, PPV, NPV and accuracy of patient-reported/clinically examined, joints, with ultrasonography<sup>a</sup> as reference

| Joint/site | Examination                    | Sensitivity (95% CI) | Specificity (95% CI) | PPV (95% CI)     | NPV (95% CI)     | Accuracy |
|------------|--------------------------------|----------------------|----------------------|------------------|------------------|----------|
| Wrist      | Clinically examined swelling   | 0.32 (0.20–0.47)     | 1.00 (0.63–1.0)      | 1.00 (0.79–1.0)  | 0.19 (0.09–0.34) | 0.43     |
|            | Patient-reported swelling      | 0.34 (0.21–0.49)     | 0.87 (0.47–1.0)      | 0.94 (0.73–1.0)  | 0.17 (0.07–0.33) | 0.40     |
|            | Clinically examined tenderness | 0.32 (0.20–0.47)     | 1.00 (0.63–1.0)      | 1.00 (0.79–1.0)  | 0.19 (0.09–0.34) | 0.43     |
|            | Patient-reported tenderness    | 0.32 (0.20–0.47)     | 1.00 (0.63–1.0)      | 1.00 (0.79–1.0)  | 0.19 (0.09–0.34) | 0.40     |
| MCP        | Clinically examined swelling   | 0.13 (0.07–0.20)     | 0.98 (0.95–1.0)      | 0.83 (0.59–0.96) | 0.63 (0.57–0.69) | 0.64     |
|            | Patient-reported swelling      | 0.18 (0.12–0.26)     | 0.91 (0.86–0.95)     | 0.57 (0.39–0.73) | 0.62 (0.56–0.68) | 0.62     |
|            | Clinically examined tenderness | 0.29 (0.21–0.38)     | 0.89 (0.83–0.93)     | 0.63 (0.49–0.76) | 0.65 (0.59–0.71) | 0.65     |
|            | Patient-reported tenderness    | 0.22 (0.14–0.30)     | 0.86 (0.80–0.91)     | 0.51 (0.36–0.66) | 0.62 (0.56–0.68) | 0.60     |
| PIP        | Clinically examined swelling   | 0.04 (0.00–0.13)     | 0.97 (0.95–0.99)     | 0.25 (0.03–0.65) | 0.83 (0.78–0.87) | 0.81     |
|            | Patient-reported swelling      | 0.12 (0.04–0.24)     | 0.95 (0.91–0.97)     | 0.32 (0.13–0.57) | 0.83 (0.78–0.88) | 0.80     |
|            | Clinically examined tenderness | 0.25 (0.14–0.40)     | 0.92 (0.87–0.95)     | 0.39 (0.23–0.58) | 0.85 (0.80–0.89) | 0.80     |
|            | Patient-reported tenderness    | 0.16 (0.07–0.29)     | 0.87 (0.82–0.91)     | 0.21 (0.09–0.36) | 0.83 (0.78–0.87) | 0.74     |

<sup>a</sup>US inflammation was defined as synovitis and/or tenosynovitis in wrist, synovitis in MCP and PIP, EULAR-OMERACT combined score  $\geq 1$ . Grade 1 EULAR-OMERACT combined score is defined as hypoechoic synovial/tenosynovial hypertrophy grade 1 and colour Doppler grade  $\leq 1$ . NPV: negative predictive value; OMERACT: Outcomes Measures in Rheumatology; PPV: positive predictive value.

limitations in mind, our results are in line with previous studies showing limited concordance between patient reports and US when different cut-offs for US positive signs of synovitis are applied [18, 42]. In our study, the agreement between patient-reported swollen joints and US inflammation varied between 41 and 80%, dependent on joint size, and for patient-reported tenderness ranged from 41% to 74%.

Despite being a frequent finding in RA patients, tenosynovitis still appears to be an underestimated manifestation of RA and widely used clinical indices do not include tendon involvement [30, 35]. In the current study, we looked for both synovitis and tenosynovitis at the time of flare, as the ability to differentiate between these two conditions can be clinically challenging. The Sonographic Tenosynovitis/arthritis Assessment in Rheumatoid Arthritis Patients in Remission (STARTER) study highlighted the importance of incorporating tenosynovitis-targeted US assessment of RA patients in clinical remission [35, 43]. Our study showed tenosynovitis both at baseline, despite required low disease activity and no clinically swollen joints, and during self-reported flares, which calls for inclusion of ultrasonographic tendon assessment at the time of flare.

Several studies comparing clinical examination and patients' self-assessment showed stronger associations between patients and physicians with respect to tender than to swollen joints [11, 13, 14]. In our study, we observed that patients and clinicians agreed more frequently on swelling than on tenderness. Even though we analysed data at joint level and not at patient level, our results support the notion that patients may reliably report swelling by self-evaluating joints at the time of flare. A short training has been shown to be sufficient to enhance patients' abilities to accurately assess joint swelling [44]. Although we did not carry out an extensive patient training program on joint evaluation, we may assume that the good performance in evaluating joints

for swelling was partly due to the instructions the patients received at study entry. Together with the observation that patients performed only slightly differently from the clinical assessors when compared with US, this may have implications for clinical practice by making patients candidates for self-assessment of disease activity when a flare occurs between scheduled appointments.

Our study has various strengths: a homogeneous cohort of RA patients, the same rheumatologist performing all US assessments with high inter- and intra-observer reliability and the same research nurse instructing all the patients. Furthermore, 55% of the patients were evaluated the same day they contacted the outpatient clinic, and the remainder within 72 h. Clinical and US examinations and patient-reported outcomes, including joint assessment, were all performed on the same day, which strengthens the associations since flare is a dynamic phenomenon.

Limitations are the one-centre design and the relatively small sample size. Another potential limitation may be a selected spectrum of RA, since we only included RF and/or anti-CCP-positive patients. The presence of autoantibodies is indicative of a more severe disease course and is associated with bone damage [45]. However, it remains unknown whether patients who do not develop immune response differ from patients in whom autoantibodies are present regarding different flare phenotypes.

In the current study only tendons at the wrist level were included as distinction between synovitis and tenosynovitis may be clinically challenging in this region. Another limitation may be the applied definition of a positive joint/tendon sheath on US, as grade 1 synovial hypertrophy has been observed in normal subjects [46, 47]. However, the most common abnormality in healthy joints is effusion, which is not scored by the OMERACT-EULAR composite US score [27, 28, 47]. Grade 1 synovial hypertrophy has

previously been utilized as the cut-off [43, 48] and although it is a strict definition, recent papers have shown that both grade 1 synovial and tenosynovial hypertrophy are responsive to treatment, and thus reflect true inflammation [49, 50]. The optimal cut-off between pathology and normality in arthritic joints has yet to be determined.

In conclusion, our findings suggest that patient-reported flares reflect inflammatory disease activity. Patient report, clinical examination and US may capture different aspects of patient-reported flares; however, this assumption needs to be further investigated. Patient self-assessment of joints, which was highly concordant with clinical examination, may be a potential amendment to traditional monitoring of RA patients to capture flares between routine clinical visits.

## Acknowledgements

We thank research secretary Kirsten Frøhlich and research radiographer Henning Jakobsen, Danish Hospital for Rheumatic Diseases in Sønderborg, for logistic support.

**Funding:** This work was supported by research grants from the Danish Rheumatism Association, University of Southern Denmark, The Region of Southern Denmark, Knud og Edith Eriksens Mindefond.

**Disclosure statement:** The authors have declared no conflicts of interest.

## References

- Welsing PM, van Gestel AM, Swinkels HL, Kiemeny LA, van Riel PL. The relationship between disease activity, joint destruction, and functional capacity over the course of rheumatoid arthritis. *Arthritis Rheum* 2001;44:2009–17.
- Van der Heijde DM, van't Hof MA, van Riel PL *et al.* Judging disease activity in clinical practice in rheumatoid arthritis: first step in the development of a disease activity score. *Ann Rheum Dis* 1990;49:916–20.
- Prevoe MLL, van't Hof MA, Kuper HH *et al.* Modified disease activity scores that include twenty-eight-joint counts: development and validation in a prospective longitudinal study of patients with rheumatoid arthritis. *Arthritis Rheum* 1995;38:44–8.
- Smolen JS, Breedveld FC, Schiff MH *et al.* A simplified disease activity index for rheumatoid arthritis for use in clinical practice. *Rheumatology (Oxford)* 2003;42:244–57.
- Pincus T. Limitations of a quantitative swollen and tender joint count to assess and monitor patients with rheumatoid arthritis. *Bull NYU Hosp Jt Dis* 2008;66:216–23.
- Pincus T, Segurado OG. Most visits of most patients with rheumatoid arthritis to most rheumatologists do not include a formal quantitative joint count. *Ann Rheum Dis* 2006;65:820–2.
- El M, El GM, Youssef SS, Palmer D. Incorporating patient-reported outcome measures in clinical practice: development and validation of a questionnaire for inflammatory arthritis. *Clin Exp Rheumatol* 2010;28:734–44.
- Smolen JS, Landewé R, Bijlsma J *et al.* EULAR recommendations for the management of rheumatoid arthritis with synthetic and biological disease-modifying antirheumatic drugs: 2016 update. *Ann Rheum Dis* 2017;76:960–77.
- Nota I, Drossaert CH, Taal E, Vonkeman HE, van de Laar MA. Patient participation in decisions about disease modifying anti-rheumatic drugs: a cross-sectional survey. *BMC Musculoskelet Disord* 2014;15:333.
- Osborne RH, Wilson T, Lorig KR, McColl GJ. Does self-management lead to sustainable health benefits in people with arthritis? A 2-year transition study of 452 Australians. *J Rheumatol* 2007;34:1112–7.
- Kavanaugh A, Lee SJ, Weng HH *et al.* Patient-derived joint counts are a potential alternative for determining disease activity score. *J Rheumatol* 2010;37:1035–41.
- Radner H, Grisar J, Smolen JS, Stamm T, Aletaha D. Value of self-performed joint counts in rheumatoid arthritis patients near remission. *Arthritis Res Ther* 2012;14:R61.
- Barton JL, Criswell LA, Kaiser R, Chen YH, Schillinger D. Systematic review and metaanalysis of patient self-report versus trained assessor joint counts in rheumatoid arthritis. *J Rheumatol* 2009;36:2635–41.
- Figuroa F, Braun-Moscovici Y, Khanna D *et al.* Patient self-administered joint tenderness counts in rheumatoid arthritis are reliable and responsive to changes in disease activity. *J Rheumatol* 2007;34:54–6.
- Marhadour T, Jousse-Joulin S, Chalès G *et al.* Reproducibility of joint swelling assessments in long-lasting rheumatoid arthritis: influence on Disease Activity Score-28 values (SEA-Repro study part I). *J Rheumatol* 2010;37:932–7.
- Naredo E, Bonilla G, Gamero F *et al.* Assessment of inflammatory activity in rheumatoid arthritis: a comparative study of clinical evaluation with grey scale and power Doppler ultrasonography. *Ann Rheum Dis* 2005;64:375–81.
- Salaffi F, Filippucci E, Carotti M *et al.* Inter-observer agreement of standard joint counts in early rheumatoid arthritis: a comparison with grey scale ultrasonography—a preliminary study. *Rheumatology (Oxford)* 2008;47:54–8.
- Cheung PP, Ruysen-Witrand A, Gossec L *et al.* Reliability of patient self-evaluation of swollen and tender joints in rheumatoid arthritis: a comparison study with ultrasonography, physician, and nurse assessments. *Arthritis Care Res* 2010;62:1112–9.
- Kuettel D, Primdahl J, Christensen R, Ørnbjerg LM, Hørslev-Petersen K. Impact of patient-reported flares on radiographic progression and functional impairment in patients with rheumatoid arthritis: a cohort study based on the AMBRA trial. *Scand J Rheumatol* 2018;47:87–94.
- Saleem B, Brown AK, Quinn M *et al.* Can flare be predicted in DMARD treated RA patients in remission, and is it important? A cohort study. *Ann Rheum Dis* 2012;71:1316–21.
- Ometto F, Raffeiner B, Bernardi L *et al.* Self-reported flares are predictors of radiographic progression in rheumatoid arthritis patients in 28-joint disease activity score remission: a 24-month observational study. *Arthritis Res Ther* 2016;18:89.
- Hammer HB, Michelsen B, Provan SA *et al.* Tender joint count may not reflect inflammatory activity in established

- rheumatoid arthritis patients - results from a longitudinal study. *Arthritis Care Res (Hoboken)* 2018; doi: 10.1002/acr.23815.
- 23 Berthelot JM, De Bandt M, Morel J *et al.* A tool to identify recent or present rheumatoid arthritis flare from both patient and physician perspectives: the 'FLARE' instrument. *Ann Rheum Dis* 2012;71:1110–6.
  - 24 Bartlett SJ, Barbic SP, Bykerk V *et al.* Content and construct validity, reliability, and responsiveness of the rheumatoid arthritis flare questionnaire: OMERACT 2016 Workshop Report. *J Rheumatol* 2017;44:1536–43.
  - 25 Torp-Pedersen S, Christensen R, Szkudlarek M *et al.* Power and color Doppler ultrasound settings for inflammatory flow: impact on scoring of disease activity in patients with rheumatoid arthritis. *Arthritis Rheumatol* 2015;67:386–95.
  - 26 Torp-Pedersen ST, Terslev L. Settings and artefacts relevant in colour/power Doppler ultrasound in rheumatology. *Ann Rheum Dis* 2008;67:143–9.
  - 27 D'Agostino MA, Terslev L, Aegerter P *et al.* Scoring ultrasound synovitis in rheumatoid arthritis: a EULAR OMERACT ultrasound taskforce-Part 1: definition and development of a standardised, consensus-based scoring system. *RMD Open* 2017;3:e000428.
  - 28 Terslev L, Naredo E, Aegerter P *et al.* Scoring ultrasound synovitis in rheumatoid arthritis: a EULAR-OMERACT ultrasound taskforce-Part 2: reliability and application to multiple joints of a standardised consensus-based scoring system. *RMD Open* 2017;3:e000427.
  - 29 D'Agostino M-A, Boers M, Wakefield RJ *et al.* Exploring a new ultrasound score as a clinical predictive tool in patients with rheumatoid arthritis starting abatacept: results from the APPRAISE study. *RMD Open* 2016;2:e000237.
  - 30 Ammitzbøll-Danielsen M, Østergaard M, Naredo E, Terslev L. Validity and sensitivity to change of the semi-quantitative OMERACT ultrasound scoring system for tenosynovitis in patients with rheumatoid arthritis. *Rheumatology (Oxford)* 2016;55:2156–66.
  - 31 Landis JR, Koch GG. The measurement of observer agreement for categorical data. *Biometrics* 1977;33:159–74.
  - 32 van der Maas A, Lie E, Christensen R *et al.* Construct and criterion validity of several proposed DAS28-based rheumatoid arthritis flare criteria: an OMERACT cohort validation study. *Ann Rheum Dis* 2013;72:1800–5.
  - 33 van der Mass A, den Broeder AA. Measuring flares in rheumatoid arthritis. (Why) Do we need validated criteria? *J Rheumatol* 2014;41:189–91.
  - 34 Bykerk VP, Lie E, Bartlett SJ *et al.* Establishing a core domain set to measure rheumatoid arthritis flares: report of the OMERACT 11 RA flare Workshop. *J Rheumatol* 2014;41:799–809.
  - 35 Filippou G, Sakellariou G, Scirè CA *et al.* The predictive role of ultrasound-detected tenosynovitis and joint synovitis for flare in patients with rheumatoid arthritis in stable remission. Results of an Italian multicentre study of the Italian Society for Rheumatology Group for Ultrasound: the STARTER study. *Ann Rheum Dis* 2018;77:1283–9.
  - 36 Rees JD, Pilcher J, Heron C, Kiely P. A comparison of clinical vs ultrasound determined synovitis in rheumatoid arthritis utilizing gray-scale, power Doppler and the intravenous microbubble contrast agent 'Sono-Vue'. *Rheumatology (Oxford)* 2007;46:454–9.
  - 37 Janta I, Naredo E, Martinez-Estupinan L *et al.* Patient self-assessment and physician's assessment of rheumatoid arthritis activity: which is more realistic in remission status? A comparison with ultrasonography. *Rheumatology (Oxford)* 2013;52:2243–50.
  - 38 Hirata A, Ogura T, Hayashi N *et al.* Concordance of patient-reported joint symptoms, physician-examined arthritic signs, and ultrasound-detected synovitis in rheumatoid arthritis. *Arthritis Care Res* 2017;69:801–6.
  - 39 Szkudlarek M, Court-Payen M, Strandberg C *et al.* Power Doppler ultrasonography for assessment of synovitis in the metacarpophalangeal joints of patients with rheumatoid arthritis: a comparison with dynamic magnetic resonance imaging. *Arthritis Rheum* 2001;44:2018–23.
  - 40 Hmamouchi I, Bahiri R, Srifi N *et al.* A comparison of ultrasound and clinical examination in the detection of flexor tenosynovitis in early arthritis. *BMC Musculoskelet Disord* 2011;12:91.
  - 41 Cheung PP, Dougados M, Gossec L. Reliability of ultrasonography to detect synovitis in rheumatoid arthritis: a systematic literature review of 35 studies (1, 415 patients). *Arthritis Care Res* 2010;62:323–34.
  - 42 Cheung PP, Gossec L, Ruysen-Witrand A *et al.* The relationship of patient reported joints with active synovitis detected by power Doppler ultrasonography in rheumatoid arthritis. *Clin Exp Rheumatol* 2013;31:490–7.
  - 43 Bellis E, Scirè CA, Carrara G *et al.* Ultrasound-detected tenosynovitis independently associates with patient-reported flare in patients with rheumatoid arthritis in clinical remission: results from the observational study STARTER of the Italian Society for Rheumatology. *Rheumatology (Oxford)* 2016;55:1826–36.
  - 44 Levy G, Cheetham C, Cheatwood A, Burchette R. Validation of patient-reported joint counts in rheumatoid arthritis and the role of training. *J Rheumatol* 2007;34:1261–5.
  - 45 Hecht C, Englbrecht M, Rech J *et al.* Additive effect of anti-citrullinated protein antibodies and rheumatoid factor on bone erosions in patients with RA. *Ann Rheum Dis* 2015;74:2151–6.
  - 46 Witt M, Mueller F, Nigg A *et al.* Relevance of grade 1 gray-scale ultrasound findings in wrists and small joints to the assessment of subclinical synovitis in rheumatoid arthritis. *Arthritis Rheum* 2013;65:1694–701.
  - 47 Padovano I, Costantino F, Breban M, D'Agostino MA. Prevalence of ultrasound synovial inflammatory findings in healthy subjects. *Ann Rheum Dis* 2016;75:1819–23.
  - 48 Garrigues F, Jousse-Joulin S, Bouttier R *et al.* Concordance between clinical and ultrasound findings in rheumatoid arthritis. *Joint Bone Spine* 2013;80:597–603.
  - 49 Terslev L, Østergaard M, Sexton J, Hammer HB. Is synovial hypertrophy without Doppler activity sensitive to change? Post-hoc analysis from a rheumatoid arthritis ultrasound study. *Arthritis Res Ther* 2018;20:224.
  - 50 Ammitzbøll-Danielsen M, Østergaard M, Naredo E *et al.* The use of the OMERACT ultrasound tenosynovitis scoring system in multicenter clinical trials. *J Rheumatol* 2018;45:165–9.
